# Supplementary material for: A New Sesquiterpene from the Fruits of Daucus carota L
Source: Molecules. 2009 Aug 3;14(8):2862–7. doi: 10.3390/molecules14082862 (PMC6255428; doi:10.3390/molecules14082862)
Supplement: Supplementary File 1 [file molecules-14-02862-s001.pdf]

Correction

**Fu et al. A New Sesquiterpene from the Fruits of *Daucus carota* L. *Molecules* 2009, 14, 2862-2867**

**Hong-Wei Fu<sup>1,2</sup>, Lin Zhang<sup>1,2</sup>, Tao Yi<sup>1</sup> and Jing-Kui Tian<sup>1,2,\*</sup>**

<sup>1</sup> Department of Biomedical Engineering, Zhejiang University, Hangzhou 310027, China;  
E-mail: zxttk@gmail.com (H-W.F.)

<sup>2</sup> Zhejiang Provincial Key Laboratory of Chinese Medicine Screening, Exploitation and Medicinal Effectiveness Appraisal for Cardio-Cerebral Vascular and Nervous System, The Key Laboratory of Biomedical Engineering of the Ministry of Education, Hangzhou 310027, China;  
E-mail: zhanglin@zju.edu.cn (L.Z.)

\* Author to whom correspondence should be addressed; E-mail: tjtk@zju.edu.cn;  
Tel.: +86-571-88208454; Fax: +86-571-87951091

Received: 25 September 2009 / Published: 28 September 2009

---

We realized that the affiliations of the authors were incorrectly listed in our paper published in *Molecules* recently [1]. The correct affiliations are the following:

**Hong-Wei Fu<sup>1,2</sup>, Lin Zhang<sup>1,2</sup>, Tao Yi<sup>1</sup> and Jing-Kui Tian<sup>1,2</sup>**

<sup>1</sup> Department of Biomedical Engineering, Zhejiang University, Hangzhou 310027, China;  
E-mail: zxttk@gmail.com (H-W.F.)

<sup>2</sup> Zhejiang Provincial Key Laboratory of Chinese Medicine Screening, Exploitation and Medicinal Effectiveness Appraisal for Cardio-Cerebral Vascular and Nervous System, The Key Laboratory of Biomedical Engineering of the Ministry of Education, Hangzhou 310027, China;  
E-mail: zhanglin@zju.edu.cn (L.Z.)

**References and Notes**

1. Fu, H.-W.; Zhang, L.; Yi, T.; Tian, J.-K. A New Sesquiterpene from the Fruits of *Daucus carota* L.. *Molecules* 2009, 14, 2862-2867.

© 2009 by the authors; licensee Molecular Diversity Preservation International, Basel, Switzerland. This article is an open-access article distributed under the terms and conditions of the Creative Commons Attribution license (<http://creativecommons.org/licenses/by/3.0/>).
